# Supplementary material for: Thiol–epoxy ‘click’ polymerization: efficient construction of reactive and functional polymers
Source: Royal Society of Chemistry journal article supplement (doi:10.1039/c2py20591b), 2012-01-01
Supplement: c2py20591b.pdf [file c2py20591b.pdf]

## Thiol-epoxy 'click' polymerization: Efficient construction of reactive and functional polymers

Andreas Brändle and Anzar Khan\*

Department of Materials, Swiss Federal Institute of Technology (ETH), CH-8093 Zürich, Switzerland.  
E-mail: anzar.khan@mat.ethz.ch

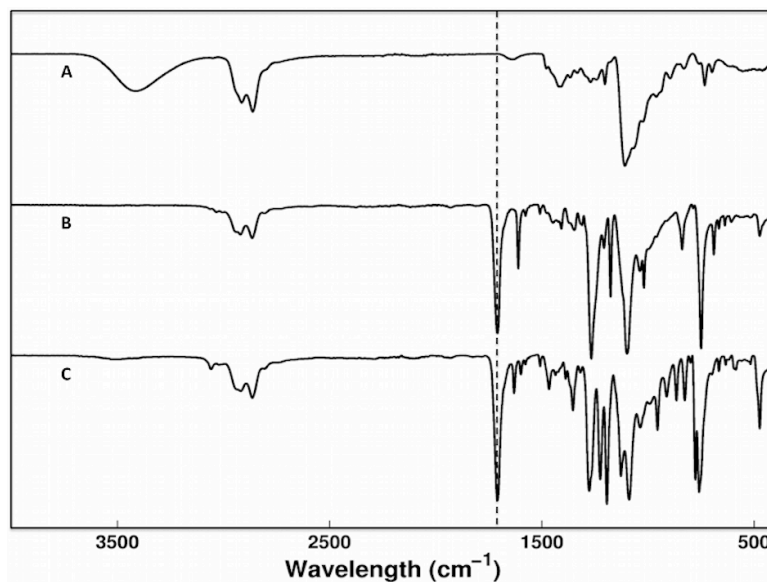

Figure S1. IR spectra of polymers **3** (A), **4** (B) and **5** (C). The dashed line shows the ester stretches of the functional polymers.

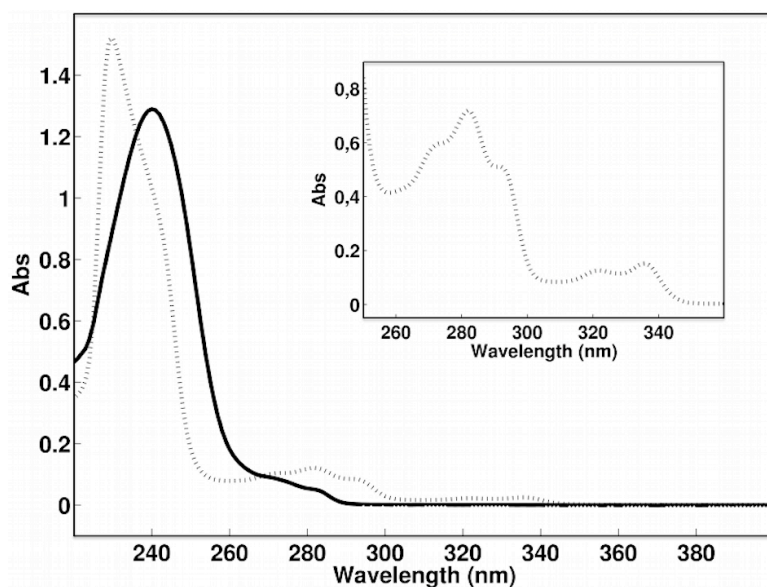

Figure S2. UV/Vis absorption spectra of polymer **4** (solid line) and **5** (dashed line). The inset shows the absorption spectrum of polymer **5** from 250-350 nm.
